# Supplementary material for: Interventions to standardise hospital care at presentation, admission or discharge or to reduce unnecessary admissions or readmissions for patients with acute exacerbation of chronic obstructive pulmonary disease: a scoping review
Source: HighWire-hosted journal article supplement (doi:10.1136/bmjresp-2020-000733), 2020-12-01
Supplement: bmjresp-2020-000733supp001_data_supplement.pdf [file bmjresp-2020-000733supp001_data_supplement.pdf]

**Supplementary material I Full search terms**

| #    | Web of Science search terms                                                                                                                                                                       | Results    |
|------|---------------------------------------------------------------------------------------------------------------------------------------------------------------------------------------------------|------------|
| # 11 | #9 NOT #10<br><i>Timespan=1993-2018 Search language=English</i>                                                                                                                                   | 985        |
| # 10 | TS = (vaccin*)<br><i>Timespan=1993-2018 Search language=English</i>                                                                                                                               | 341,458    |
| # 9  | #8 NOT #6<br><i>Timespan=1993-2018 Search language=English</i>                                                                                                                                    | 999        |
| # 8  | #5 AND #4 AND #3 AND #1<br><i>Timespan=1993-2018 Search language=English</i>                                                                                                                      | 1,370      |
| # 7  | TS = (access OR care or path)<br><i>Timespan=1993-2018 Search language=English</i>                                                                                                                | 2,870,066  |
| # 6  | TS = (smok* OR environ* OR viral OR virus)<br><i>Timespan=1993-2018 Search language=English</i>                                                                                                   | 5,011,281  |
| # 5  | TS = (exacer* OR worse*)<br><i>Timespan=1993-2018 Search language=English</i>                                                                                                                     | 323,336    |
| # 4  | TS = (model OR path* OR provi* OR access OR integr*)<br><i>Timespan=1993-2018 Search language=English</i>                                                                                         | 18,625,989 |
| # 3  | TS =(re\$admission OR re\$admit* OR admit* OR admission OR discharge OR transfer)<br><i>Timespan=1993-2018 Search language=English</i>                                                            | 2,067,948  |
| # 2  | TS = (pathway OR specialist OR direct)<br><i>Timespan=1993-2018 Search language=English</i>                                                                                                       | 3,361,512  |
| #1   | TI = (COPD or COAD or (chronic obstructive airways disease) or (chronic obstructive pulmonary disease) OR (chronic bronchitis) or emphysema)<br><i>Timespan=1993-2018 Search language=English</i> | 51,326     |

| #  | EMBASE/ EBSCO search terms                                                                                                                                                                                                                                                                                                                                                        | Results |
|----|-----------------------------------------------------------------------------------------------------------------------------------------------------------------------------------------------------------------------------------------------------------------------------------------------------------------------------------------------------------------------------------|---------|
| #1 | TI ( (COPD or COAD or (chronic obstructive airways disease) or (chronic obstructive pulmonary disease) OR (chronic bronchitis) or emphysema ) AND AB ( (re\$admission OR re\$admit* OR admit* OR admission OR discharge OR transfer) ) AND AB ( (model OR path* OR provi* OR access OR integr*) ) AND AB ( (exacer* OR worse*) ) NOT AB ( (smok* OR environ* OR viral OR virus) ) | 111     |

| #                   | Pubmed search terms                                                                                                                                                                                                                                                                                                                                                                                                                                                                                        | Results                 |
|---------------------|------------------------------------------------------------------------------------------------------------------------------------------------------------------------------------------------------------------------------------------------------------------------------------------------------------------------------------------------------------------------------------------------------------------------------------------------------------------------------------------------------------|-------------------------|
| <a href="#">#15</a> | Search (COPD)[Title/Abstract] OR (COAD)[Title/Abstract] OR (chronic obstructive pulmonary disease)[Title/Abstract] OR (emphysema)[Title/Abstract] OR (chronic bronchitis)[Title/Abstract]                                                                                                                                                                                                                                                                                                                  | <a href="#">1</a>       |
| <a href="#">#14</a> | Search (((((((COPD) OR (COAD) OR (chronic obstructive pulmonary disease) OR (emphysema) OR (chronic bronchitis))) AND ((exacer*[Title/Abstract]) OR worse*[Title/Abstract])) AND (((model[Title/Abstract]) OR path*[Title/Abstract]) OR provi*[Title/Abstract]) OR access[Title/Abstract]) OR integr*[Title/Abstract])) AND (((re\$adm*[Title/Abstract]) OR adm*[Title/Abstract]) OR discharge[Title/Abstract]) OR transfer[Title/Abstract])) NOT ((smok*) OR (environ*) OR (viral) OR (virus) OR (vacc*)) | <a href="#">588</a>     |
| <a href="#">#13</a> | Search (((((COPD) OR (COAD) OR (chronic obstructive pulmonary disease) OR (emphysema) OR (chronic bronchitis))) AND ((exacer*[Title/Abstract]) OR worse*[Title/Abstract])) AND (((model[Title/Abstract]) OR path*[Title/Abstract]) OR provi*[Title/Abstract]) OR access[Title/Abstract]) OR integr*[Title/Abstract])) AND (((re\$adm*[Title/Abstract]) OR adm*[Title/Abstract]) OR discharge[Title/Abstract]) OR transfer[Title/Abstract])                                                                 | <a href="#">772</a>     |
| <a href="#">#12</a> | Search ((COPD)[Title] OR (COAD)[Title] OR (chronic obstructive pulmonary disease)[Title] OR (emphysema)[Title] OR (chronic bronchitis)[Title])                                                                                                                                                                                                                                                                                                                                                             | <a href="#">34</a>      |
| <a href="#">#11</a> | Search (COPD) OR (COAD) OR (chronic obstructive pulmonary disease) OR (emphysema) OR (chronic bronchitis)                                                                                                                                                                                                                                                                                                                                                                                                  | <a href="#">101959</a>  |
| <a href="#">#10</a> | Search (((((COPD)[Title] OR COAD)[Title] OR chronic obstructive pulmonary disease)[Title] OR emphysema)[Title] OR chronic bronchitis)[Title])                                                                                                                                                                                                                                                                                                                                                              | <a href="#">34</a>      |
| <a href="#">#9</a>  | Search (((((((COPD[Title]) OR COAD[Title]) OR chronic obstructive pulmonary disease[Title]) OR emphysema[Title]) AND chronic bronchitis[Title])) AND (((re\$adm*[Title/Abstract]) OR adm*[Title/Abstract]) OR discharge[Title/Abstract]) OR transfer[Title/Abstract])) AND (((model[Title/Abstract]) OR path*[Title/Abstract]) OR provi*[Title/Abstract]) OR access[Title/Abstract]) OR integr*[Title/Abstract])) AND ((exacer*[Title/Abstract]) OR worse*[Title/Abstract])                                | <a href="#">2</a>       |
| <a href="#">#8</a>  | Search (((smok*[Title/Abstract]) OR environ*[Title/Abstract]) OR viral[Title/Abstract]) OR virus[Title/Abstract]                                                                                                                                                                                                                                                                                                                                                                                           | <a href="#">1784255</a> |
| <a href="#">#7</a>  | Search (exacer*[Title/Abstract]) OR worse*[Title/Abstract]                                                                                                                                                                                                                                                                                                                                                                                                                                                 | <a href="#">259092</a>  |
| <a href="#">#6</a>  | Search (((model[Title/Abstract]) OR path*[Title/Abstract]) OR provi*[Title/Abstract]) OR access[Title/Abstract]) OR integr*[Title/Abstract]                                                                                                                                                                                                                                                                                                                                                                | <a href="#">4761017</a> |

|                    |                                                                                                                                                                                                                                                                                                                                                                                                                                                                                                                                                                                                                                                                                                              |                         |
|--------------------|--------------------------------------------------------------------------------------------------------------------------------------------------------------------------------------------------------------------------------------------------------------------------------------------------------------------------------------------------------------------------------------------------------------------------------------------------------------------------------------------------------------------------------------------------------------------------------------------------------------------------------------------------------------------------------------------------------------|-------------------------|
| <a href="#">#5</a> | Search (((re\$adm*[Title/Abstract]) OR adm*[Title/Abstract]) OR discharge[Title/Abstract]) OR transfer[Title/Abstract]                                                                                                                                                                                                                                                                                                                                                                                                                                                                                                                                                                                       | <a href="#">1870796</a> |
| <a href="#">#4</a> | Search (((COPD[Title] OR COAD[Title]) OR chronic obstructive pulmonary disease[Title]) OR emphysema[Title]) AND chronic bronchitis[Title]                                                                                                                                                                                                                                                                                                                                                                                                                                                                                                                                                                    | <a href="#">586</a>     |
| <a href="#">#3</a> | Search ((COPD[Title] OR COAD[Title] OR (chronic obstructive airways disease)[Title] OR (chronic obstructive pulmonary disease)[Title] OR (chronic bronchitis)[Title] OR emphysema)[Title])                                                                                                                                                                                                                                                                                                                                                                                                                                                                                                                   | <a href="#">31</a>      |
| <a href="#">#2</a> | Search ((((((COPD[Title] OR COAD[Title] OR (chronic obstructive airways disease)[Title] OR (chronic obstructive pulmonary disease)[Title] OR (chronic bronchitis)[Title] OR emphysema)[Title])) AND ((re\$admission[Title/Abstract] OR re\$admit*[Title/Abstract] OR admit*[Title/Abstract] OR admission[Title/Abstract] OR discharge[Title/Abstract] OR transfer)[Title/Abstract])) AND ((model[Title/Abstract] OR path*[Title/Abstract] OR provi*[Title/Abstract] OR access[Title/Abstract] OR integr*[Title/Abstract])) AND ((exacer*[Title/Abstract] OR worse*[Title/Abstract])) NOT ((smok*[Title/Abstract] OR environ*[Title/Abstract] OR viral[Title/Abstract] OR virus)[Title/Abstract]) Schema: all | <a href="#">0</a>       |
| <a href="#">#1</a> | Search ((((((COPD[Title] OR COAD[Title] OR (chronic obstructive airways disease)[Title] OR (chronic obstructive pulmonary disease)[Title] OR (chronic bronchitis)[Title] OR emphysema)[Title])) AND ((re\$admission[Title/Abstract] OR re\$admit*[Title/Abstract] OR admit*[Title/Abstract] OR admission[Title/Abstract] OR discharge[Title/Abstract] OR transfer)[Title/Abstract])) AND ((model[Title/Abstract] OR path*[Title/Abstract] OR provi*[Title/Abstract] OR access[Title/Abstract] OR integr*[Title/Abstract])) AND ((exacer*[Title/Abstract] OR worse*[Title/Abstract])) NOT ((smok*[Title/Abstract] OR environ*[Title/Abstract] OR viral[Title/Abstract] OR virus)[Title/Abstract])             | <a href="#">0</a>       |
